# Supplementary material
Source: Springer Nature journal article supplement (https://www.springermedizin.de/resource/supplementary/13024_2011_224_MOESM3_ESM.pdf/9643690)

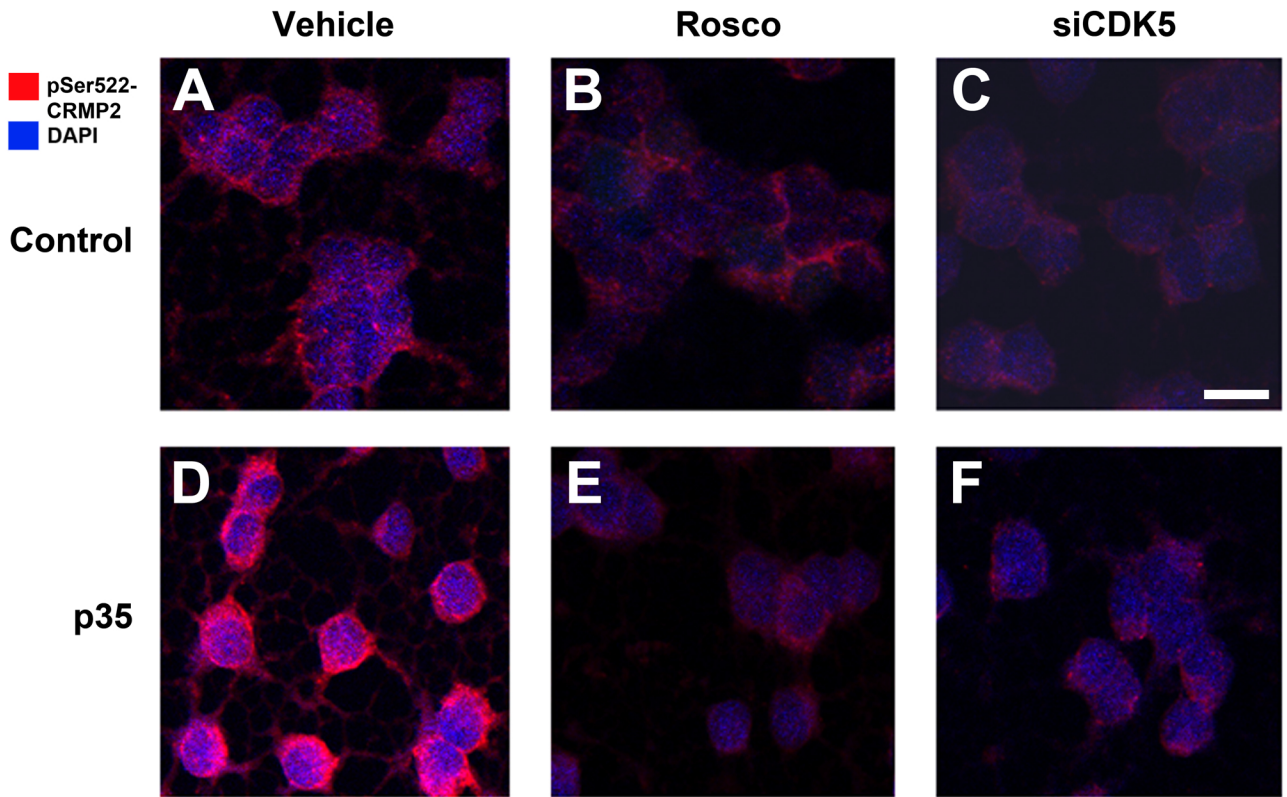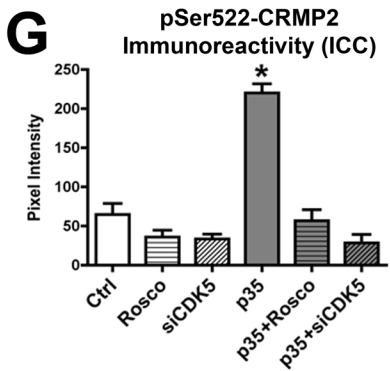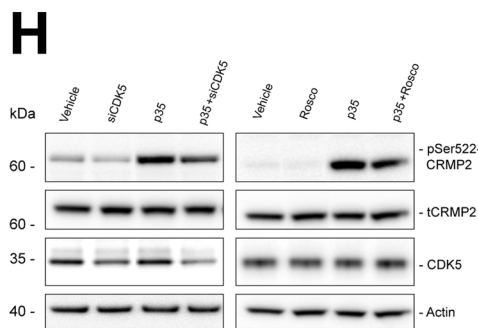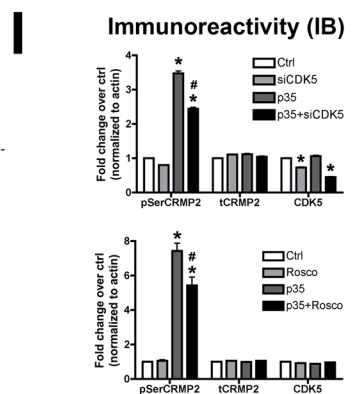

Supplement: MOESM3 [file 9643690]
